# Supplementary material for: Unexpected partial correction of metabolic and behavioral phenotypes of Alzheimer’s APP/PSEN1 mice by gene targeting of diabetes/Alzheimer’s-related Sorcs1
Source: PubMed Central journal article supplement (PMC4766719; doi:10.1186/s40478-016-0282-y), 2016-02-25

**Additional file 1: Figure S1. Young *Sorcs1* <sup>-/-</sup>, *APP/PSEN1* mice and *Sorcs1* <sup>-/-</sup> x *APP/PSEN1* mice display normal glucose homeostasis.** Glucose tolerance testing (**a,c**), fasting plasma insulin (**b,d**), body weight (**e,g**), body length (**f,h**), fasting plasma glycerol (**i,k**), fasting plasma triglycerides (**j,l**), lean mass (**m,o**) and fat mass (**n,p**) in cohorts of male and female WT (n=5-8/group), *Sorcs1* <sup>-/-</sup> (n=10/group), *APP/PSEN1* (n=4-8/group) and *Sorcs1* <sup>-/-</sup> x *APP/PSEN1* (n=4-6/group). Cohorts were maintained on standard rodent chow from weaning and assessed at 4-5 months of age. \**P*<0.05, \*\**P*<0.01 and \*\*\**P*<0.001; One-way ANOVA with Bonferroni posthoc analyses. Data expressed as mean ± s.e.m.

# Additional file 1: Figure S1

## Female

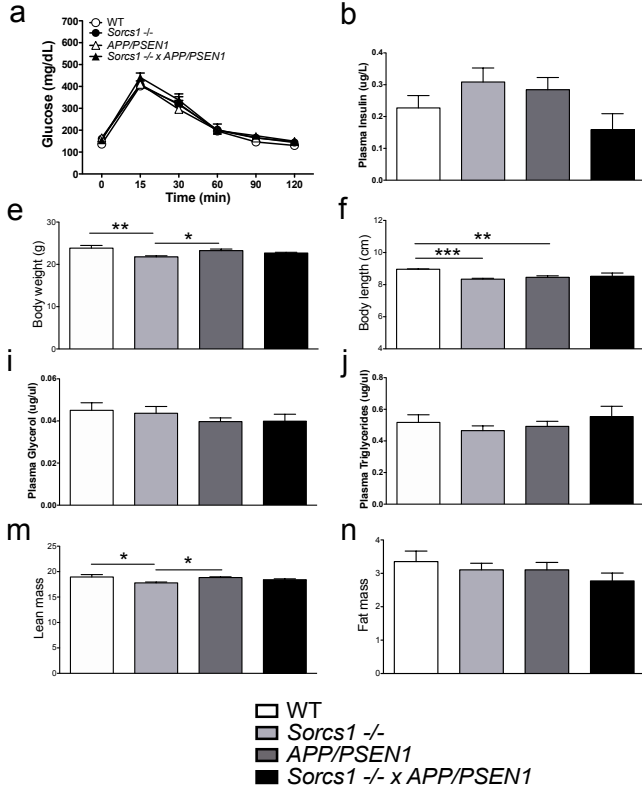

## Male

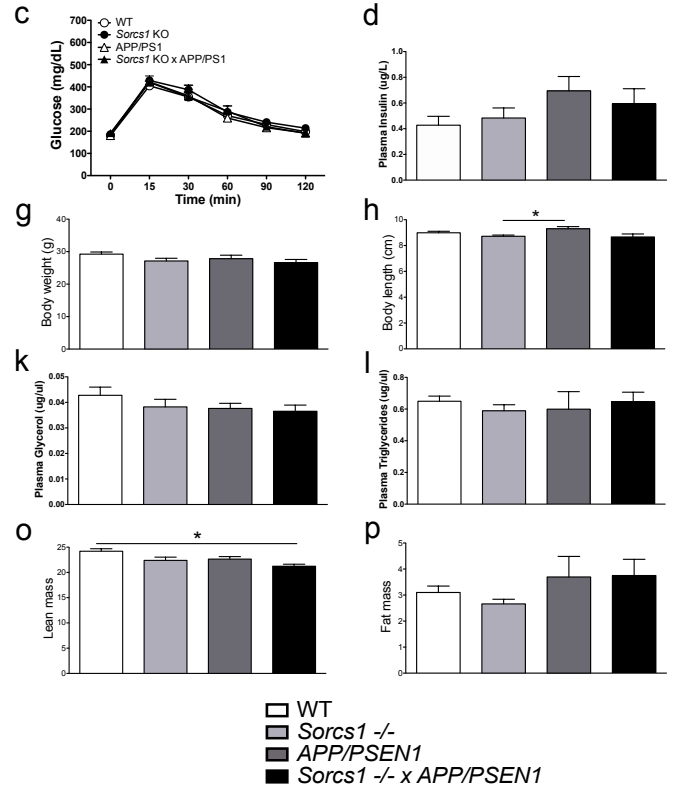

Supplement: 40478_2016_282_MOESM1_ESM.pdf [file 40478_2016_282_MOESM1_ESM.pdf]
